# Supplementary material
Source: PubMed Central journal article supplement (PMC4380232)
Supplement: NIHMS655070-supplement-03.pdf [file NIHMS655070-supplement-03.pdf]

**Supplemental Table 1:** cTn methods and reference limits used at the local sites at time of study enrollment.

| <b>Site</b>                    | <b>Assay</b> | <b>Local reference limit</b> |
|--------------------------------|--------------|------------------------------|
| Kaiser Permanente              | Beckman Tnl  | <0.04 ng/mL                  |
| University of Maryland         | Beckman Tnl  | <0.07 ng/mL                  |
| Washington University          | Beckman Tnl  | <0.07 ng/mL                  |
| Tufts University               | Alere Tnl    | <0.40 ng/mL                  |
| Baystate Medical Center        | Roche TnT    | <0.03 ng/mL                  |
| Massachusetts General Hospital | Roche TnT    | <0.03 ng/mL                  |

**Supplemental Table 2:** Comparison of sensitivity between cTn, sTnl, and hsTnl at baseline, second, and third draws. Both sTnl and hsTnl were more sensitive than local cTn at the first and second draws for A) ACS as well as B) UAP.

**A)**

| <b>Time point</b> | <b>Comparison</b> | <b>P value</b> |
|-------------------|-------------------|----------------|
| Baseline          | cTn vs sTnl       | <0.001         |
| Baseline          | cTn vs hsTnl      | <0.001         |
| Second draw       | cTn vs sTnl       | <0.001         |
| Second draw       | cTn vs hsTnl      | <0.001         |
| Third draw        | cTn vs sTnl       | 0.18           |
| Third draw        | cTn vs hsTnl      | 0.18           |

**B)**

| <b>Time point</b> | <b>Comparison</b> | <b>P value</b> |
|-------------------|-------------------|----------------|
| Baseline          | cTn vs sTnl       | 0.01           |
| Baseline          | cTn vs hsTnl      | 0.01           |
| Second draw       | cTn vs sTnl       | 0.03           |
| Second draw       | cTn vs hsTnl      | 0.03           |
| Third draw        | cTn vs sTnl       | 0.32           |
| Third draw        | cTn vs hsTnl      | 0.32           |

**Supplemental Table 3:** Associations between concentrations of A) sTnI and B) hsTnI and presence or extent of epicardial CAD and coronary artery calcium in patients undergoing CTA considered as a function of the 99<sup>th</sup> percentile. Using this approach, a significantly number of subjects with CAD would be missed with either method.

**A) sTnI**

|                             | <b>sTnI &lt;99<sup>th</sup> percentile</b> | <b>sTnI ≥99<sup>th</sup> percentile</b> | <b>P value</b> |
|-----------------------------|--------------------------------------------|-----------------------------------------|----------------|
| Calcium score, median [IQR] | 0 [0-27]                                   | 213 [38-521]                            | <0.001         |
| Any CAD                     | 55.3%                                      | 90.0%                                   | 0.05           |
| Stenosis >50%               | 18.7%                                      | 80.0%                                   | <0.001         |
| Stenosis >70%               | 12.0%                                      | 70.0%                                   | <0.001         |

**B) hsTnI**

|                             | <b>hsTnI &lt;99<sup>th</sup> percentile</b> | <b>hsTnI ≥99<sup>th</sup> percentile</b> | <b>P value</b> |
|-----------------------------|---------------------------------------------|------------------------------------------|----------------|
| Calcium score, median [IQR] | 0 [0-28]                                    | 111 [1.6-480]                            | 0.003          |
| Any CAD                     | 55.4%                                       | 83.3%                                    | 0.07           |
| Stenosis >50%               | 18.2%                                       | 75.0%                                    | <0.001         |
| Stenosis >70%               | 12.2%                                       | 58.3%                                    | <0.001         |
